# Supplementary material for: Hyper Expression of Active, GFP-fused HFGF21 in Tobacco Chloroplasts
Source: Research Square preprint supplement (doi:10.21203/rs.3.rs-1299734/v1), 2022-02-16
Supplement: Supplementary file 1 [file 6ee26b57a22872b7c3025637.xlsx]

## Sheet: Sheet1
	GFP-FGF21 content(%)								GFP-FGF21 content (mg/gFW)		TSP content mg/mL
Sample	Repeat A	Repeat B	Repeat C	Repeat D	Repeat E	Repeat F	Mean	SD	SD	Mean	SD	Mean	Repeat A	Repeat B	Repeat C	Repeat D	Repeat E	Repeat F
Line1	11.93	12.21	12.08	12.05	11.91	11.94	12.02	0.115931	0.0178321	1.84888	0.030605	15.3817	15.34	15.36	15.41	15.37	15.42	15.39
Line2	13.21	13.17	12.92	12.87	13.01	13.07	13.0417	0.134821	0.020859	2.01776	0.0986745	15.4717	15.44	15.61	15.47	15.31	15.52	15.48
Line3	11.58	11.64	11.56	11.76	11.51	11.62	11.6117	0.0858875	0.0134171	1.81394	0.11479	15.6217	15.73	15.56	15.44	15.67	15.74	15.59
Line4	12.14	12.01	11.89	11.84	11.98	11.91	11.9617	0.106849	0.0164868	1.84569	0.132061	15.43	15.37	15.51	15.27	15.63	15.33	15.47
Line5	12.67	12.46	12.61	12.57	12.57	12.49	12.5617	0.0770498	0.0121674	1.9837	0.079854	15.7917	15.74	15.73	15.82	15.72	15.81	15.93
Line6	12.61	12.59	12.63	12.74	12.57	12.64	12.63	0.0596657	0.00913582	1.93386	0.0570672	15.3117	15.34	15.27	15.33	15.24	15.4	15.29
Line7	12.95	12.91	12.81	12.94	12.78	12.84	12.8717	0.0713909	0.0111858	2.01678	0.189359	15.6683	15.89	15.91	15.45	15.54	15.59	15.63
Line8	12.71	12.62	12.73	12.87	12.82	12.68	12.7383	0.0919601	0.0138921	1.92434	0.0886942	15.1067	15.25	15.14	15.03	15.14	15.07	15.01
Line9	12.42	12.89	12.57	12.62	12.55	12.62	12.6117	0.154844	0.023784	1.93715	0.0651153	15.36	15.43	15.37	15.44	15.33	15.31	15.28
Line10	12.27	12.42	12.31	12.47	12.38	12.34	12.365	0.0734166	0.0113343	1.90895	0.0762671	15.4383	15.56	15.41	15.47	15.39	15.34	15.46
Mean							12.4413			1.9232		15.4582
SD							0.449031			0.0673367		0.195504
